# 1 An interpretable classification method for 2 predicting drug resistance in *M. tuberculosis*

3 Hooman Zabeti

4 School of Computing Science, Simon Fraser University, Burnaby, BC, V5A 1S6, Canada

5 Nick Dexter

6 Department of Mathematics, Simon Fraser University, Burnaby, BC, V5A1S6, Canada

7 Amir Hosein Safari

8 School of Computing Science, Simon Fraser University, Burnaby, BC, V5A 1S6, Canada

9 Nafiseh Sedaghat

10 School of Computing Science, Simon Fraser University, Burnaby, BC, V5A 1S6, Canada

11 Maxwell Libbrecht

12 School of Computing Science, Simon Fraser University, Burnaby, BC, V5A 1S6, Canada

13 Leonid Chindelevitch

14 School of Computing Science, Simon Fraser University, Burnaby, BC, V5A 1S6, Canada

## 15 — Abstract —

16 **Motivation:** The prediction of drug resistance and the identification of its mechanisms in bacteria  
17 such as *Mycobacterium tuberculosis*, the etiological agent of tuberculosis, is a challenging problem.  
18 Modern methods based on testing against a catalogue of previously identified mutations often yield  
19 poor predictive performance. On the other hand, machine learning techniques have demonstrated  
20 high predictive accuracy, but lack interpretability to aid in identifying specific mutations which lead  
21 to resistance. We propose a novel technique, inspired by the group testing problem and Boolean  
22 compressed sensing, which yields highly accurate predictions and interpretable results at the same  
23 time.

24 **Results:** We develop a modified version of the Boolean compressed sensing problem for identifying  
25 drug resistance, and implement its formulation as an integer linear program. This allows us to  
26 characterize the predictive accuracy of the technique and select an appropriate metric to optimize.  
27 A simple adaptation of the problem also allows us to quantify the sensitivity-specificity trade-off of  
28 our model under different regimes. We test the predictive accuracy of our approach on a variety  
29 of commonly used antibiotics in treating tuberculosis and find that it has accuracy comparable to  
30 that of standard machine learning models and points to several genes with previously identified  
31 association to drug resistance.

32 **Availability:** [https://github.com/WGS-TB/DrugResistance/tree/RB\\_learning](https://github.com/WGS-TB/DrugResistance/tree/RB_learning)

33 **Contact:** hooman\_zabeti@sfu.ca

35 **2012 ACM Subject Classification** Applied computing - Life and medical sciences - Computational  
36 biology - Molecular sequence analysis

37 **Keywords and phrases** Drug resistance; whole-genome sequencing; interpretable machine learning;  
38 integer linear programming; rule-based learning

39 **Digital Object Identifier** 10.4230/LIPIcs.CVIT.2016.23

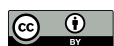

© Hooman Zabeti, Nick Dexter, Amir Hosein Safari, Nafiseh Sedaghat, Maxwell Libbrecht, Leonid Chindelevitch;

licensed under Creative Commons License CC-BY

42nd Conference on Very Important Topics (CVIT 2016).

Editors: John Q. Open and Joan R. Access; Article No. 23; pp. 23:1–23:18

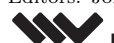

Leibniz International Proceedings in Informatics

LIPIcs Schloss Dagstuhl – Leibniz-Zentrum für Informatik, Dagstuhl Publishing, Germany

## 23:2 An interpretable classification method for drug resistance

**Acknowledgements** The authors would like to thank Dr. Cedric Chauve, Dr. Ben Adcock and Matthew Nguyen for helpful discussions. This project was funded by the Genome Canada grant BAC283. LC acknowledges additional funding from the CANSSI CRT and NSERC Discovery.

### 1 Introduction

Drug resistance is the phenomenon by which an infectious organism (also known as pathogen) develops resistance to one or more drugs that are commonly used in treatment [36]. In this paper we focus our attention on *Mycobacterium tuberculosis*, the etiological agent of tuberculosis, which is the largest infectious killer in the world today, responsible for over 10 million new cases and 2 million deaths every year [37].

The development of resistance to common drugs used in treatment is a serious public health threat, not only in low and middle-income countries, but also in high-income countries where it is particularly problematic in hospital settings [39]. It is estimated that, without the urgent development of novel antimicrobial drugs, the total mortality due to drug resistance will exceed 10 million people a year by 2050, a number exceeding the annual mortality due to cancer today [35].

Existing models for predicting drug resistance from whole-genome sequence (WGS) data broadly fall into two classes. The first, which we refer to as “catalogue methods,” involves testing the WGS data of an isolate for the presence of point mutations (typically single-nucleotide polymorphisms, or SNPs) associated with known drug resistance. If one or more such mutations is identified, the isolate is declared to be resistant [45, 14, 5, 20, 15]. While these methods tend to be easy to understand and apply, they often suffer from poor predictive accuracy [43], especially in identifying novel drug resistance mechanisms or screening resistance to untested or rarely-used drugs.

The second class, which we will refer to as “machine learning methods”, seeks to infer the drug resistance of an isolate by training complex models directly on WGS and drug susceptibility test (DST) data [47, 11, 3]. Such methods tend to result in highly accurate predictions at the cost of flexibility and interpretability - specifically, they typically do not provide any insights into the drug resistance mechanisms involved and often do not impose explicit limits on the predictive model’s complexity. Learning approaches based on deep neural networks are one such example.

In this paper we propose a novel method, based on the group testing problem and Boolean compressed sensing (CS), for the prediction of drug resistance. Compressed sensing is a mathematical technique for sparse signal recovery from under-determined systems of linear equations [16], and has been successfully applied in many application areas including digital signal processing [13, 12], MRI imaging [26], radar detection [18], and computational uncertainty quantification [29, 9]. Under a sparsity assumption on the unknown signal vector, it has been shown that CS techniques enable recovery from far fewer measurements than required by the Nyquist-Shannon sampling theorem [6]. Boolean CS is a slight modification of the CS problem, replacing the matrix vector product with a Boolean OR operator [28], and has been successfully applied to areas such as group testing for infection [4, 1].

Our approach combines some of the flexibility and interpretability of catalogue methods with the accuracy of machine learning methods—specifically, this method is capable of recovering interpretable rules for predicting drug resistance that both result in a high classification accuracy as well as provide insights into the mechanisms of drug resistance. We show that

our methods perform comparably to standard machine learning methods on *Mycobacterium tuberculosis* in terms of predicting first-line drug resistance, while accurately recovering many of the known mechanisms of drug resistance, and identifying some potentially novel ones.

## 2 Methods

Our proposed method is based on the rule-based classification technique introduced in [28], wherein group testing and Boolean CS are combined to determine subsets of infected individuals from large populations. In that setting the linear system encodes the infection status of the population through testing, and the solution, obtained from a suitable decoder, is a  $\{0, 1\}$ -valued vector representing the infection status of the individuals [7]. Since the infected group is assumed to be small, the solution vector is sparse and can be recovered using relatively few measurements with Boolean CS. The result of solving the Boolean CS problem can then be interpreted as a sparse set of rules for determining infections and used for classification on unseen data.

We present our methodology as follows. Section 2.1 introduces the group testing problem, and discusses how group testing can be combined with compressed sensing to deliver an interpretable predictive model. Section 2.2 introduces modifications to the standard setting to produce an accurate and flexible classifier, which can be tuned for specific evaluation metrics and tasks. Section 2.3 describes the tuning process for providing the desired trade-off between sensitivity and specificity in our model's predictions. Finally, Section 2.4 describes an approximation of the AUROC (area under receiver operating characteristic curve), a standard metric in machine learning, that is valid for evaluating the proposed approach.

### 2.1 Group testing and Boolean compressed sensing

We frame the problem of predicting drug resistance given sequence data as a group testing problem, originally introduced in [10]. This approach for detecting defective members of a set, was motivated by the need to screen large populations for syphilis while drafting citizens into military service for the United States during the World War II. The screening, performed by testing blood samples, was costly due to the low numbers of infected individuals. To make the screening more efficient, Dorfman suggested pooling blood samples into specific groups and testing the groups instead. A positive result for the group would imply the presence of at least one infected member. The problem then becomes to find the subset of individuals whose infected status would explain all of the positive results without invalidating any of the negative ones. By carefully selecting the groups, the total number of required tests  $m$  can be drastically reduced, i.e. if  $n$  is the population size, it is possible to achieve  $m \ll n$ .

Mathematically, a group testing problem with  $m$  tests can be described in terms of a Boolean matrix  $A \in \{0, 1\}^{m \times n}$ , where  $A_{ij}$  indicates the membership status of subject  $j$  in the  $i$ -th test group, and a Boolean vector  $y \in \{0, 1\}^m$ , where  $y_i$  represents the test result of the  $i$ -th group. If  $w \in \{0, 1\}^n$  is a Boolean vector, with  $w_j$  representing the infection status of the  $j$ -th individual, then the result of all  $m$  tests will satisfy

$$y = A \vee w, \tag{1}$$

## 23:4 An interpretable classification method for drug resistance

124 where  $\vee$  is the Boolean inclusive OR operator, so that (1) can also be written

$$125 \quad y_i = \bigvee_{j=1}^n A_{i,j} \wedge w_j \quad \forall 1 \leq i \leq m.$$

126 If the vector  $w$  satisfying equation (1) is assumed to be sparse (i.e. there are few infected  
127 individuals), the problem of finding  $w$  is an instance of the sparse Boolean vector recovery  
128 problem:

$$129 \quad \min \|w\|_0 \quad \textbf{subject to} \quad y = A \vee w, \quad (2)$$

130 where  $\|w\|_0$  is the number of non-zero entries in the vector  $w$ .

131 Due to the non-convexity of the  $\ell_0$ -norm and the nonlinearity of the Boolean matrix product,  
132 the combinatorial optimization problem (2) is well-known to be NP-hard, see, e.g., [16,  
133 Section 2.3] or [33]. In [27] a relaxation of (2) via linear programming is proposed, with the  
134  $\ell_0$ -norm replaced by the  $\ell_1$ -norm (much like in basis pursuit for standard compressed sensing),  
135 and with the nonlinear Boolean matrix product also replaced with two closely related linear  
136 constraints. We recapitulate their equivalent 0-1 linear programming formulation here:

$$137 \quad \begin{aligned} & \min \sum_{j=1}^n w_j \\ 138 \quad & \text{s.t.} \quad w \in \{0, 1\}^n \\ & \quad A_{\mathcal{P}} w \geq 1 \\ & \quad A_{\mathcal{Z}} w = 0, \end{aligned} \quad (3)$$

139 where  $\mathcal{P} = \{i : y_i = 1\}$  and  $\mathcal{Z} = \{i : y_i = 0\}$  are the sets of groups that test positive and  
140 negative, respectively. However, this problem is also NP-hard, but can be made tractable  
141 for linear programming by relaxing the Boolean constraint on  $w$  in (3) to  $0 \leq w_j \leq 1$  for all  
142  $j \in \{1, \dots, n\}$ .

143 [28] extended this idea for interpretable rule-based classification, meanwhile proving recovery  
144 guarantees for the relaxed problem. Because the Boolean CS problem is based on Boolean  
145 algebra, the conditions on the Boolean measurement matrices  $A$  that guarantee exact recovery  
146 of  $K$ -sparse vectors via linear programming are quite different from those of standard CS.  
147 Specifically, these guarantees require the definition of  $K$ -disjunct matrices, i.e., matrices  $A$   
148 for which all unions of their columns of size  $K$  do not contain any other columns of the  
149 original matrix. Constructions exist for matrices with  $\mathcal{O}(K^2 \log(n))$  rows which satisfy this  
150 property. We also note that by introducing an *approximate disjunctness* property, allowing  
151 for matrices for which a fraction  $(1 - \varepsilon)$  of all  $\binom{n}{K}$  possible  $K$ -subsets of the columns satisfy  
152 the disjunctness condition, it was shown in [30] that there exist constructions of measurement  
153 matrices  $A$  which allow for recovery from  $\mathcal{O}(K^{3/2} \sqrt{\log(n/\varepsilon)})$  rows.

154 In the standard setting for uniform recovery results for CS, the measurement matrices  $A$   
155 are subgaussian random matrices, i.e., having entries  $A_{i,j}$  drawn independently according  
156 to a subgaussian distribution. Examples include  $m \times n$  matrices consisting of Rademacher  
157 or Gaussian random variables, for which uniform recovery of  $K$ -sparse vectors via  $\ell_1$ -  
158 minimization has been shown under the condition  $m$  is  $\mathcal{O}(K \log(n/K))$ , see, e.g. [16, Chapter  
159 9] for more details. While subgaussian matrices have been shown to possess the most

desirable recovery guarantees, they are not always applicable for every measurement scheme, in particular the one considered here.

In this work, we only consider the Boolean constrained problem, i.e.  $w \in \{0, 1\}^n$ , though we adopt the slack variables and regularization proposed by [28] to trade off between the sparsity and the discrepancy with the test results of the relaxed problem. With these modifications in the Boolean constrained problem (3), our problem becomes:

$$\min \sum_{j=1}^n w_j + \lambda \sum_{i=1}^m \xi_i \quad (4a)$$

$$\text{s.t. } w \in \{0, 1\}^n \quad (4b)$$

$$0 \leq \xi_i \leq 1, \quad i \in \mathcal{P} \quad (4c)$$

$$0 \leq \xi_i, \quad i \in \mathcal{Z} \quad (4d)$$

$$A_{\mathcal{P}} w + \xi_{\mathcal{P}} \geq 1 \quad (4e)$$

$$A_{\mathcal{Z}} w - \xi_{\mathcal{Z}} = 0, \quad (4f)$$

where  $\lambda > 0$  is a regularization parameter. This Boolean constrained problem formulation can be solved via integer linear programming (ILP) techniques, see, e.g., [28].

## 2.1.1 Generalization to other contexts

The solution to the ILP (4) can be seen as an interpretable rule-based classifier in contexts beyond standard group testing. Given a rule for forming the matrix  $A$ , encoding binary attributes of a set of objects through multiple measurements or tests, and test data  $y$ , the general problem is to derive a Boolean disjunction that best classifies previously unseen objects from their features. In such a general setting, a context-specific technique for dichotomizing features may be needed [40]. However, in the case of drug resistance prediction, our features are the presence or absence of specific single-nucleotide polymorphisms (SNPs), and therefore no dichotomization is needed.

From now on, we assume that we have a binary labeled dataset  $\mathcal{D} = \{(x_1, y_1), \dots, (x_m, y_m)\}$ , where the  $x_i \in \mathcal{X} := \{0, 1\}^n$  are  $n$ -dimensional binary feature vectors and the  $y_i \in \{0, 1\}$  are the binary labels. The feature matrix  $A$  is defined via  $A_{i,j} = (x_i)_j$  (the  $j$ -th component of the  $i$ -th feature vector). If  $\hat{w}$  is the solution of ILP (4) for this feature matrix and the label vector  $y = (y_i)_{i=1}^m$ , we define the classifier  $\hat{c} : \mathcal{X} \rightarrow \{0, 1\}$  as follows:

$$\hat{c}(x) = x \vee \hat{w}. \quad (5)$$

## 2.2 Our approach

The formulation of the ILP (4) is designed to provide a trade-off between the sparsity of a disjunctive rule and the total slack, a quantity that resembles (but does not equal) the training error. Unmodified, these conditions are not ideal for machine learning tasks: *i*) they do not allow for accurate expression of this error, and *ii*) they lack the ability to assign different weights to different components of the error. Such a weighting can play a large role in settings where the data is highly unbalanced, or when the cost of a false positive differs greatly from that of a false negative. We now describe an approach that provides more flexibility in the training process and performs better on specific tasks such as ours.

Recall that the regularization parameter  $\lambda$  in equation (4) provides control over the trade-off between the total slack and the sparsity of the solution. It is straightforward to generalize

## 23:6 An interpretable classification method for drug resistance

201 this term to provide useful information about the classifier's false positive and false negative  
202 rates. To obtain this information, we modify the ILP (4) in two ways.

203 For clarity, in the following section we assume that  $\hat{c}$  is a binary classifier trained on a sample  
204  $y$  with corresponding Boolean feature matrix  $A$ . In addition, unless otherwise stated, we  
205 refer to the misclassification of a training sample as a false negative if it has label 1 (is in  $\mathcal{P}$ ),  
206 and as a false positive if it has label 0 (is in  $\mathcal{Z}$ ). For instance, in the case of drug resistance,  
207 a false negative would mean that we incorrectly predict a drug-resistant isolate as sensitive,  
208 while a false positive would mean that we predict a drug-sensitive isolate as resistant.

209 First, note that in ILP (4),  $\xi_{\mathcal{P}}$  corresponds to the training error of  $\hat{c}$  on the positively labeled  
210 subset of the data, while  $\xi_{\mathcal{Z}}$  does not correspond to its training error on the negatively  
211 labeled subset. This follows from the fact that  $A$  is a binary matrix and  $w$  is a binary vector,  
212 so  $\xi_{\mathcal{P}}$  is also a binary vector, with

$$213 \quad \sum_{i \in \mathcal{P}} \xi_i = 1^T \xi_{\mathcal{P}} = \text{FN}, \quad (6)$$

214 the number of false negatives. On the other hand, to obtain the number of false positives  
215 (FP) we need to modify the constraints (4d) and (4f) by setting

$$216 \quad \xi_i \in \{0, 1\}, \quad i \in \mathcal{Z} \quad (7)$$

217 and replacing  $A_{\mathcal{Z}}w - \xi_{\mathcal{Z}} = 0$  with the inequalities:

$$218 \quad A_{\mathcal{Z}}w - \xi_{\mathcal{Z}} \geq 0, \quad (8a)$$

$$219 \quad \alpha_i \xi_i - A_i w \geq 0 \quad \forall i \in \mathcal{Z}, \quad (8b)$$

220 where  $\alpha_i = \sum_{j=1}^n A_{i,j}$  and  $A_i$  represent  $i$ th row of  $A$ . Note that the motivation behind this  
221 replacement is to count the number of non-zero elements of  $A_{\mathcal{Z}}w$  by  $\xi_{\mathcal{Z}}$ . Therefore, we  
222 can observe that eq.(8a) ensure that  $\xi_i = 0$  if  $A_i w = 0$  and eq.(8b) ensures that  $\xi_i = 1$   
223 if  $A_i w > 0$ . However, eq.(8a) can be eliminated in those settings where the  $\xi_{\mathcal{Z}}$  enter the  
224 objective function to be minimized with a positive coefficient. We will see similar situations  
225 in the following section.

226 After these modifications, we obtain

$$227 \quad \sum_{i \in \mathcal{Z}} \xi_i = 1^T \xi_{\mathcal{Z}} = \text{FP}. \quad (9)$$

228 To provide the desired flexibility, we further split the regularization term into two terms  
229 corresponding to the positive class  $\mathcal{P}$  and the negative class  $\mathcal{Z}$ :

$$230 \quad \lambda_{\mathcal{P}} \sum_{i \in \mathcal{P}} \xi_i + \lambda_{\mathcal{Z}} \sum_{k \in \mathcal{Z}} \xi_k. \quad (10)$$

231 The general form of the new ILP is now as follows:

$$232 \quad \begin{aligned} & \min \quad \sum_{j=1}^n w_j + \lambda_{\mathcal{P}} \sum_{i \in \mathcal{P}} \xi_i + \lambda_{\mathcal{Z}} \sum_{k \in \mathcal{Z}} \xi_k \\ & \text{s.t.} \quad w \in \{0, 1\}^n \\ & \quad 0 \leq \xi_i \leq 1, \quad i \in \mathcal{P} \\ & \quad \xi_i \in \{0, 1\}, \quad i \in \mathcal{Z} \\ & \quad A_{\mathcal{P}}w + \xi_{\mathcal{P}} \geq 1 \\ & \quad \alpha_i \xi_i - A_i w \geq 0 \quad \forall i \in \mathcal{Z} \end{aligned} \quad (11)$$

234 In this new formulation,  $\lambda_{\mathcal{P}}$  and  $\lambda_{\mathcal{Z}}$  control the trade-off between the false positives and the  
235 false negatives, and jointly influence the sparsity of the rule. This formulation can be further  
236 tailored to optimize specific evaluation metrics. In the following section we demonstrate this  
237 for sensitivity and specificity, as an example.

## 238 2.3 Optimizing sensitivity and specificity

239 Since the ILP formulation in (11) provides us with direct access to the two components of  
240 the training error, we may modify the classifier to optimize a specific evaluation metric. For  
241 instance, assume that we would like to train the classifier  $\hat{c}$  to maximize the sensitivity at a  
242 given specificity threshold  $\bar{t}$ . First, recall that

$$243 \text{ Specificity} = \frac{\text{TN}}{\text{TN} + \text{FP}} = 1 - \frac{\text{FP}}{N}, \quad (12)$$

$$244 \text{ Sensitivity} = \frac{\text{TP}}{\text{TP} + \text{FN}} = 1 - \frac{\text{FN}}{P}. \quad (13)$$

246 From equation (10), equation (12) and the definition of  $\mathcal{Z}$ , we get the constraint

$$247 \bar{t} \leq 1 - \frac{1^T \xi_{\mathcal{Z}}}{|\mathcal{Z}|} \iff 1^T \xi_{\mathcal{Z}} \leq (1 - \bar{t})|\mathcal{Z}|. \quad (14)$$

249 Our objective is to maximize sensitivity, which is equivalent to minimizing  $\sum_{i \in \mathcal{P}} \xi_i$  by  
250 equations (13) and (6). Hence, the ILP (11) can be modified as follows:

$$\begin{aligned} \min \quad & \sum_{j=1}^n w_j + \lambda_{\mathcal{P}} \sum_{i \in \mathcal{P}} \xi_i \\ \text{s.t.} \quad & w \in \{0, 1\}^n \\ & 0 \leq \xi_i \leq 1, \quad i \in \mathcal{P} \\ & \xi_i \in \{0, 1\}, \quad i \in \mathcal{Z} \\ & A_{\mathcal{P}} w + \xi_{\mathcal{P}} \geq 1 \\ & \alpha_i \xi_i - A_i w \geq 0 \quad \forall i \in \mathcal{Z} \\ & 1^T \xi_{\mathcal{Z}} \leq (1 - \bar{t})|\mathcal{Z}|. \end{aligned} \quad (15)$$

252 The maximum specificity at given sensitivity can be found analogously.

## 253 2.4 Approximating the AUROC

254 In this section we compute an analog of the AUROC<sup>1</sup> of our classifier given a limit on rule  
255 size. Recall that the ROC is a plot demonstrating the performance of a score-producing  
256 classifier at different score thresholds, created by plotting the true positive rate (TPR) against  
257 the false positive rate (FPR). However, since the rule-based classifier produced by ILP (11)  
258 is a discrete classifier, it cannot produce a ROC curve in the usual way. To create a ROC  
259 curve for this classifier, we compute the true positive rate (TPR) for different values of  
260 the false positive rate (FPR). In addition, we set a limit on the rule size (sparsity) of the  
261 classifier.

262 More precisely, we create the ROC curve by incrementally changing the FPR and computing  
263 the optimum value of the TPR. To do so, we put varying upper bounds on the FPR and

---

<sup>1</sup> the Area Under the Receiver Operating Characteristic Curve



## 23:8 An interpretable classification method for drug resistance

proceed analogously to the previous section. For instance, assume that we would like to get the best TPR value when the FPR is at most  $\hat{t}$ , where  $0 \leq \hat{t} \leq 1$ , meaning that

$$\text{FPR} = \frac{\text{FP}}{N} \leq \hat{t}. \quad (16)$$

From equations (10), (16) and the definition of  $\mathcal{Z}$  we get

$$\frac{1^T \xi_{\mathcal{Z}}}{|\mathcal{Z}|} \leq \hat{t} \iff 1^T \xi_{\mathcal{Z}} \leq \hat{t} |\mathcal{Z}|. \quad (17)$$

Assuming further that the limit on rule size is equal to  $\hat{s}$ , we have the following constraint:

$$1^T w \leq \hat{s}. \quad (18)$$

Therefore, the modified version of the ILP (11) suitable for computing an AUROC is:

$$\begin{aligned} \min \quad & \sum_{i \in \mathcal{P}} \xi_i \\ \text{s.t.} \quad & w \in \{0, 1\}^n \\ & 0 \leq \xi_i \leq 1, \quad i \in \mathcal{P} \\ & \xi_i \in \{0, 1\}, \quad i \in \mathcal{Z} \\ & A_{\mathcal{P}} w + \xi_{\mathcal{P}} \geq 1 \\ & \alpha_i \xi_i - A_i w \geq 0 \quad \forall i \in \mathcal{Z} \\ & 1^T w \leq \hat{s} \\ & 1^T \xi_{\mathcal{Z}} \leq \hat{t} |\mathcal{Z}|. \end{aligned} \quad (19)$$

We utilize the CPLEX optimizer [19] to solve the ILP in (19).

### 3 Implementation

All the methods in this paper are implemented in the Python programming language. We use a Scikit-learn [38] implementation for the machine learning models and the CPLEX optimizer version 12.10.0 [19], together with its Python API, for our method.

#### 3.1 Data

To obtain a dataset to train and evaluate our method on, we combine data from the Pathosystems Resource Integration Center (PATRIC)[46] and the Relational Sequencing TB Data Platform (ReSeqTB)[44]. This results in 8000 isolates together with their resistant/susceptible status (label) for seven drugs, including five first-line drugs (rifampicin, isoniazid, pyrazinamide, ethambutol, and streptomycin) and two second-line drugs (kanamycin and ofloxacin) [34]. The short-read whole genome sequences of these 8000 isolates are downloaded from the European Nucleotide Archive [22] and the Sequence Read Archive [23].

In order to map the raw sequence data to the reference genome, we use the BWA software [24], specifically, the bwa-mem program. We then call the single-nucleotide polymorphisms (SNPs) of each isolate with two different pipelines, SAMtools [25] and GATK [41], and take the intersection of their calls to ensure reliability. The final dataset, which includes the



position as well as the reference and alternative allele for each SNP [8], is used as the input to our classifier.

Starting from this input we create a binary feature matrix, where each row represents an isolate and each column indicates the presence or absence of a particular SNP. For each drug, we group all the SNPs with identical presence/absence patterns into a single column, since at most one SNP in a group would ever be selected to be part of a rule. The number of labeled and resistant isolates and of SNPs and SNP groups for each drug is stated in Table 1.

| Drug         | Number of isolates | Number of resistant isolates | Number of SNPs | Number of SNP groups |
|--------------|--------------------|------------------------------|----------------|----------------------|
| Ethambutol   | 6,096              | 1,407                        | 666,349        | 55,164               |
| Isoniazid    | 7,734              | 3,445                        | 666,349        | 65,090               |
| Kanamycin    | 2,436              | 697                          | 666,349        | 21,513               |
| Ofloxacin    | 2,911              | 800                          | 666,349        | 23,905               |
| Pyrazinamide | 3,858              | 754                          | 666,349        | 33,942               |
| Rifampicin   | 7,715              | 2,968                        | 666,349        | 65,379               |
| Streptomycin | 5,125              | 2,104                        | 666,349        | 45,037               |

**Table 1** Summary of number of isolates in our data

## 3.2 Train-Test split

To evaluate our classifier we use a stratified train-test split, where the training set contains 80% and the testing set contains 20% of data.

## 3.3 AUROC comparison

The AUROC of our model was computed for two purposes: first, to investigate the effect of the classifier's sparsity (rule size) on its performance, and second, to compare this performance to that of other machine learning methods. We calculated the AUROC of classifiers with various limits on rule size, selected from  $\{1, 10, 20, 30, 40, 50, 60, 70, 80, 90, 100, 150, 200\}$ . For each rule size, we use the formulation in subsection 2.4, increasing the FPR upper bound from 0 to 1 in increments of 0.1. We then train a classifier by using the ILP (19), and compute the effective FPR and TPR. Lastly, we create the ROC curve by plotting the TPRs against the FPRs, and compute the AUROC.

To compare the performance of our model with other machine learning models, we also compute the AUROC of the Random Forest (RF) and  $\ell_1$ -regularized Logistic Regression (LR) models. For these models, we first perform hyper-parameter tuning using grid search with three-fold cross validation, and then select the model with the highest AUROC.

## 3.4 Sensitivity at a fixed specificity

As another evaluation criteria we compute the sensitivity of our model at a desired specificity level (i.e.  $\beta\%$  specificity). To do so, we use the ILP (15). In this formulation, the  $\lambda_P$  parameter can be tuned to provide the desired trade-off between the sparsity of the classifier (i.e., rule size) and the number of false negatives. However, in order to make a consistent comparison between the trained models for different drugs, we set a specific limit on rule size and use ILP (19) with the last constraint replaced by the last constraint of ILP (15), i.e. with (17) replaced with (14).

## 23:10 An interpretable classification method for drug resistance

### 4 Results

Evaluating the performance of an interpretable predictive model can be challenging. While most evaluation methods focus on predictive accuracy, it is essential to assess the model's interpretability. Even though there is no consensus on the definition of interpretability, the “Predictive, Descriptive, Relevant” (PDR) framework introduced by [32] provides general insights into interpretable models, by emphasizing the balance between these characteristics. In this section, we use the PDR framework to evaluate our models in the following ways.

First, in Section 4.1, we assess our method's predictive accuracy by comparing it with RF and LR. At this step we do not have any specific restriction on the rule size, and we report the best AUROC that our model can achieve based on the settings in Section 3.3.

Second, in Section 4.2, we compare the AUROC produced by our method for different limits on rule size. This comparison between the method at different parameter values helps us evaluate its ability to produce a simple model (i.e. a model with a fairly small rule size) with a high AUROC. The simpler models are easier to understand for human users. In this paper, we define the descriptiveness of a model by its simplicity (its rule size, i.e., the number of SNPs needed to define it). In addition, we evaluate our method's sensitivity by comparing it with LR and RF. To do so, we compute and compare the sensitivity of these three models at a specificity near 90%. More specifically, this comparison uses the specificity level achieved by the rule-based model that is closest to 90% (in practice, this is always between 88% and 92% for this dataset), since the rule-based model does not achieve every possible specificity level when given a limit on rule size. For this evaluation, we limit model complexity by setting a limit of 20 on the rule size.

Finally, in Section 4.3, we assess the relevance of the model produced by our method by observing the fraction of SNPs used by the model that are located in genes previously reported to be associated with drug resistance. Note that, unlike the approach in [47], we do not limit the genes *a priori* to those with known associations with drug resistance.

#### 4.1 Our models produce competitive AUROCs

Figure 1 illustrates the results of comparing our model to LR and RF. In this figure, we can see that LR provides a higher AUROC for all 7 drugs, but our model produces slightly higher AUROCs than RF for 3 of the drugs, identical AUROCs for 2 other drugs and slightly lower ones for the remaining 2.

| Drug         | Rule size $\leq 10$ | Rule size $\leq 20$ | Rule size $\leq 30$ | Rule size $\leq 40$ | Max AUROC |
|--------------|---------------------|---------------------|---------------------|---------------------|-----------|
| Ethambutol   | 0.86                | 0.86                | 0.85                | <b>0.86</b>         | 0.87      |
| Isoniazid    | 0.88                | 0.89                | 0.90                | <b>0.91</b>         | 0.92      |
| Kanamycin    | 0.88                | 0.89                | <b>0.89</b>         | 0.88                | 0.89      |
| Ofloxacin    | 0.90                | 0.87                | <b>0.90</b>         | 0.88                | 0.90      |
| Pyrazinamide | 0.88                | 0.88                | 0.88                | <b>0.89</b>         | 0.89      |
| Rifampicin   | 0.90                | 0.92                | 0.92                | <b>0.93</b>         | 0.93      |
| Streptomycin | 0.84                | 0.86                | 0.85                | <b>0.87</b>         | 0.88      |

**Table 2** Comparison between AUROC of models produced by our method with different rule size limits. We observe that even small rule sizes produce models with a high AUROC

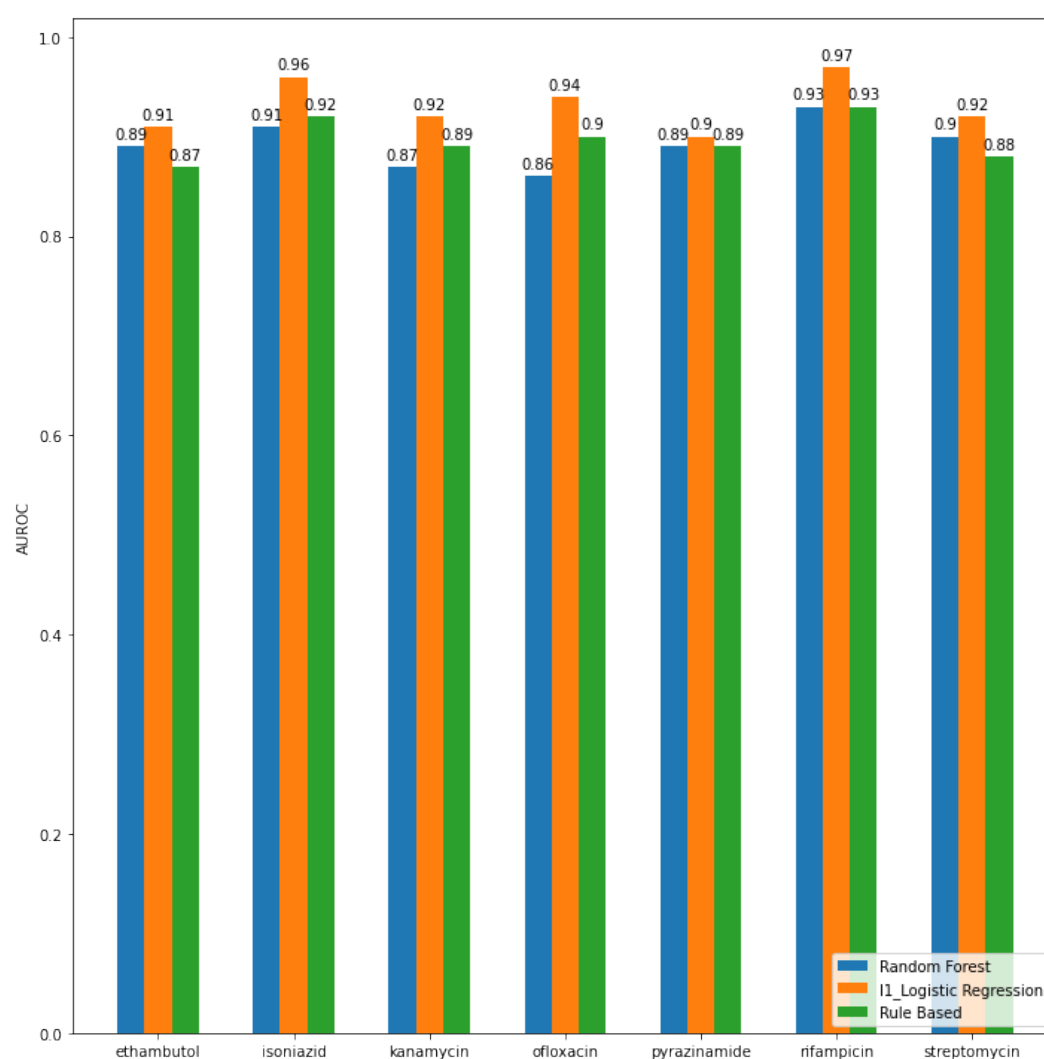

**Figure 1** Comparison between the test AUROC of our rule-based model (with no limit imposed on the rule size),  $\ell_1$ -regularized logistic regression and Random Forest.

23:12    An interpretable classification method for drug resistance

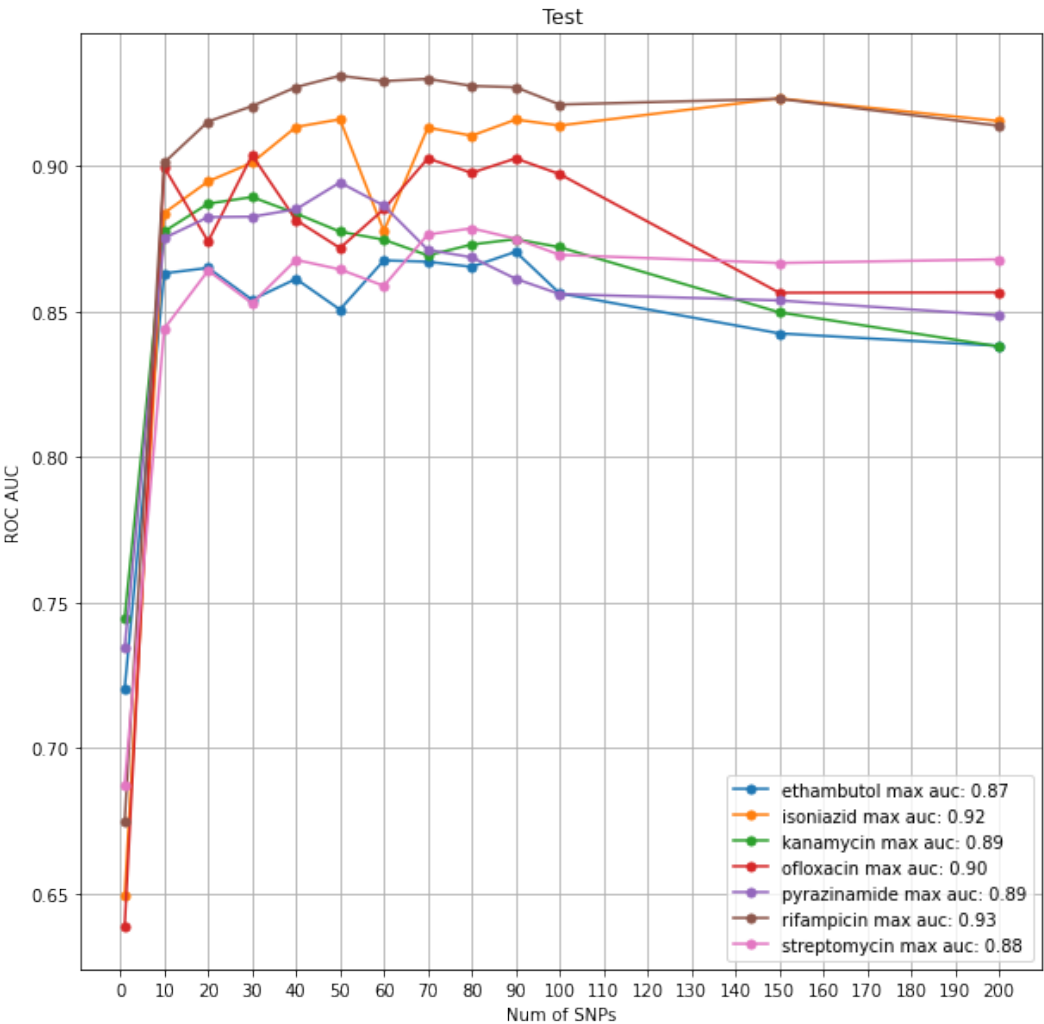

■ **Figure 2** Test AUROC for models trained on each drug with various rule size limits. Beyond a certain rule size, which varies with the drug, the AUROC of the predictive model no longer improves.

354 **4.2 Our approach is able to produce simple models with high**  
355 **AUROC**

356 Figure 2 demonstrates the change in AUROC as we increase the limit on the rule size. Our  
357 results show that as the limit on the rule size increases, we get higher AUROC on the training  
358 set. However, on the test set, we see that the AUROC increases more slowly after a rule size  
359 limit of 10, and eventually starts to decrease.

360 As shown in Figure 2 and Table 2, the AUROC does not increase significantly beyond a rule  
361 size limit of 10. Thus, our method is capable of producing models with a rule sizes small  
362 enough to keep the model simple yet keep the AUROC within 1% of the maximum.

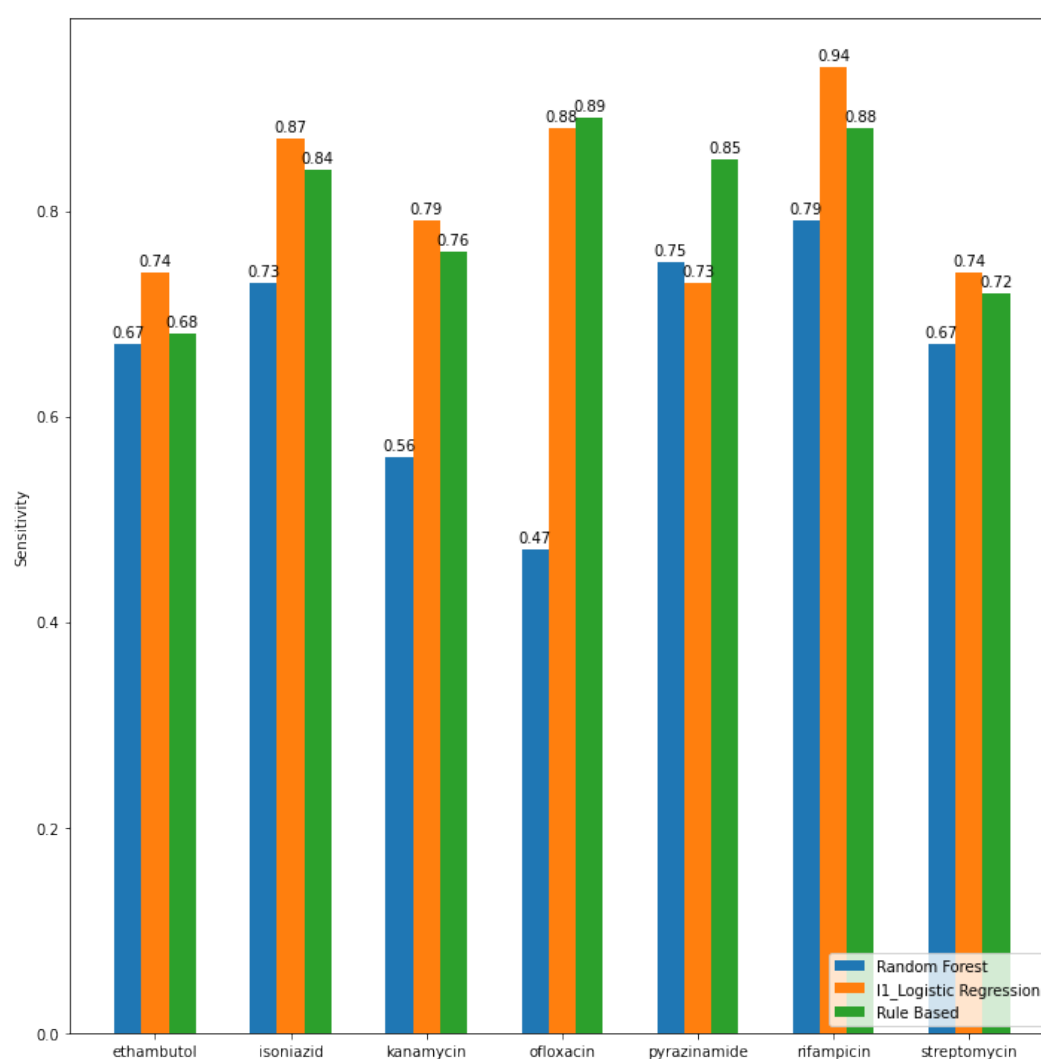

**Figure 3** Comparison between the sensitivity of our rule-based method with the rule size limit set to 20,  $\ell_1$ -Logistic regression and Random Forest at around 90% specificity on the testing data.

23:14    An interpretable classification method for drug resistance

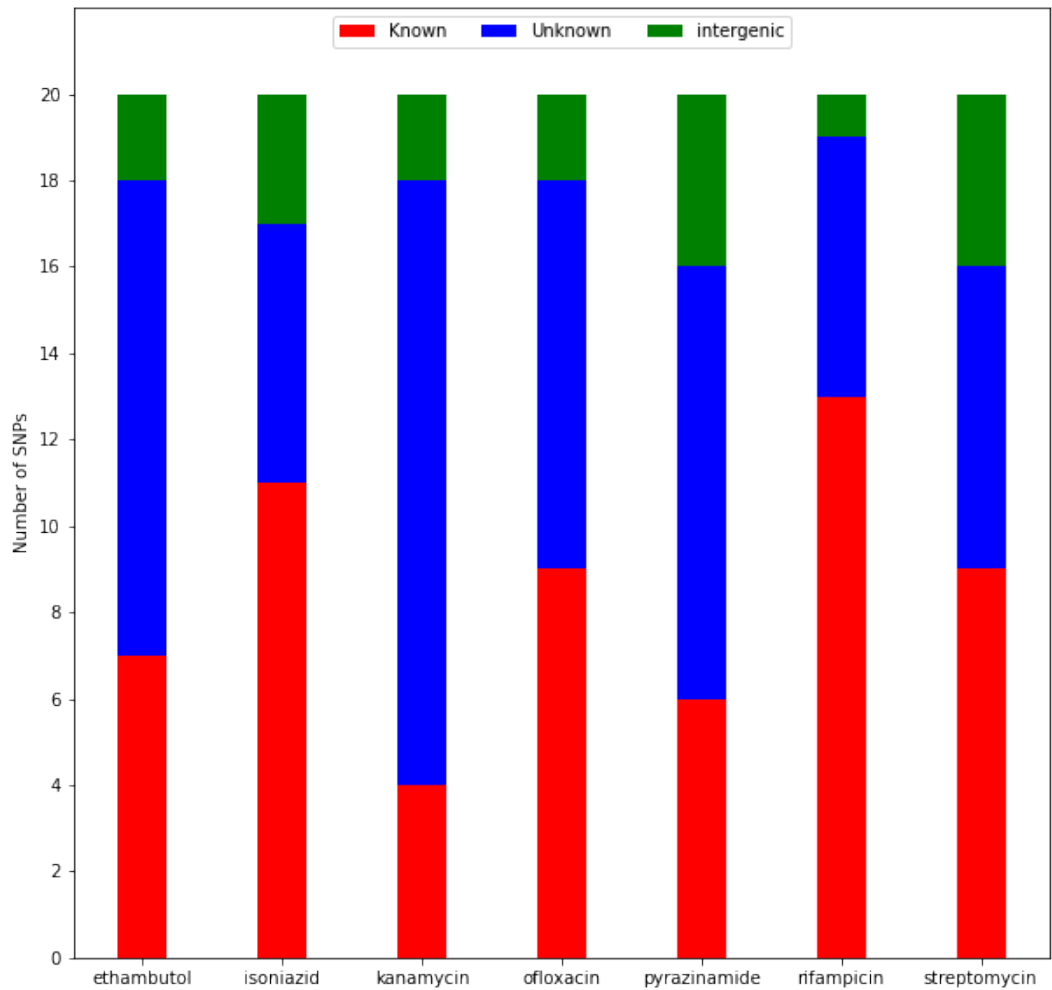

■ **Figure 4** Number of SNPs in genes with known association to drug resistance, genes without such an association, and intergenic regions, in models with at most 20 SNPs and a specificity of  $\geq 90\%$ .

363    **4.3    Our model uses genes previously associated to drug resistance**

364    Our results show that the models produced by our method contains many SNPs in genes  
365    previously associated with drug resistance in *Mycobacterium tuberculosis*. Due to the large  
366    size of SNP groups (SNPs in perfect linkage disequilibrium), the causality of specific SNPs  
367    remains difficult to determine. However, many of the genes known to be relevant to resistance  
368    mechanisms appear among the possible variants that are pointed to by the selected groups  
369    of duplicated SNPs.

370    In Figure 4 we show the number of SNPs within different classes of genes found in models  
371    with rule size  $\leq 20$  and specificity  $\geq 90\%$ , where each gene is classified according to whether it  
372    has a known association to drug resistance (“known”) or not (“unknown”), with an additional  
373    class for SNPs in intergenic regions. The list of “known” genes is the one in [31], comprising  
374    183 out of over 4,000 *M. tuberculosis* genes.

## 4.4 Running time

We run our code on a cluster node with 2 CPU sockets, each with an 8-core 2.60 GHz Intel Xeon E5-2640 v3 with 32 threads. The training of a single model with fixed hyper-parameters takes between 1 and 8 minutes. This suggests that once a suitable value is chosen for the hyper-parameters, the optimization used to determine the optimal rule can be performed efficiently. Overall, producing the ROC curve for each drug takes between 3 and 18 hours, depending on the number of labeled isolates available for each drug.

## 5 Conclusion

In this paper, we introduced a new approach for creating rule-based classifiers. Our method utilizes the group testing problem and Boolean compressed sensing. It can produce interpretable, highly accurate, flexible classifiers which can be optimized for particular evaluation metrics.

We used our method to produce classifiers for predicting drug resistance in *Mycobacterium tuberculosis*. The classifiers' predictive accuracy was tested on a variety of antibiotics commonly used for treating tuberculosis, including five first-line and two second-line drugs. We show that our method could produce classifiers with a high AUROC, slightly less than that of  $\ell_1$ -Logistic regression and comparable to Random Forest. In addition, we show that our method is capable of producing accurate models with a rule size small enough to keep the model understandable for human users. Finally, we show that our approach can provide useful insights into its input data - in this case, it could help identify genes associated with drug resistance.

We note that the presence of SNPs with identical presence/absence patterns, which would be referred to as being in perfect linkage disequilibrium (LD) in genetics [42], is common in bacteria such as *Mycobacterium tuberculosis* whose evolution is primarily clonal [17]. For this reason, while the grouping of such SNPs together substantially greatly simplifies the computational task at hand, it is challenging to ascertain the exact representative of each group that should be selected to determine the drug resistance status of an isolate. Determining this representative would likely require larger sample sizes or a built-in prior knowledge of the functional effects of individual SNPs.

We also note that the genes we define as having a known association to drug resistance are not specific to the drug being tested, i.e. some of them may have been found to be associated with the resistance to a drug other than the one being predicted. This is to be expected, however, as the distinct resistance mechanisms are generally less numerous than antibiotics [2]. It will be interesting to see whether methods such as ours are able to detect specific, for instance, by testing it on data for newly developed antibiotics such as bedaquiline and delamanid [21].

Our goal in this paper was to introduce a novel method for producing interpretable models and explore its accuracy, descriptive ability, and relevance in detecting drug resistance in *Mycobacterium tuberculosis* isolates. In this study, the focus was mostly on the predictive accuracy, and we will explore the similarities and differences between our model and other interpretable techniques (both model-based and *post-hoc* ones) in future work.



## 23:16 An interpretable classification method for drug resistance

- 
- 416 — **References** —
- 417 **1** Matthew Aldridge, Oliver Johnson, Jonathan Scarlett, et al. Group testing: an information  
418 theory perspective. *Foundations and Trends® in Communications and Information Theory*,  
419 15(3-4):196–392, 2019.
  - 420 **2** Pedro Eduardo Almeida Da Silva and Juan Carlos Palomino. Molecular basis and mechanisms  
421 of drug resistance in Mycobacterium tuberculosis: classical and new drugs. *Journal of*  
422 *Antimicrobial Chemotherapy*, 66(7):1417–1430, 05 2011.
  - 423 **3** Gustavo Arango-Argoty, Emily Garner, Amy Pruden, Lenwood S Heath, Peter Vikesland, and  
424 Liqing Zhang. DeepARG: a deep learning approach for predicting antibiotic resistance genes  
425 from metagenomic data. *Microbiome*, 6(1):1–15, 2018.
  - 426 **4** G. K. Atia and V. Saligrama. Boolean compressed sensing and noisy group testing. *IEEE*  
427 *Transactions on Information Theory*, 58(3):1880–1901, 2012.
  - 428 **5** P. Bradley, N. Gordon, T Walker, et al. Rapid antibiotic-resistance predictions from genome  
429 sequence data for Staphylococcus aureus and Mycobacterium tuberculosis. *Nature Commu-*  
430 *nications*, 6, 2015.
  - 431 **6** E. J. Candes and M. B. Wakin. An introduction to compressive sampling. *IEEE Signal*  
432 *Processing Magazine*, 25(2):21–30, 2008.
  - 433 **7** Albert Cohen, Wolfgang Dahmen, and Ronald DeVore. Compressed sensing and best  $k$ -term  
434 approximation. *Journal of the American mathematical society*, 22(1):211–231, 2009.
  - 435 **8** Wouter Deelder, Sofia Christakoudi, Jody Phelan, Ernest Diez Benavente, Susana Campino,  
436 Ruth McNerney, Luigi Palla, and Taane Gregory Clark. Machine learning predicts accurately  
437 Mycobacterium tuberculosis drug resistance from whole genome sequencing data. *Frontiers in*  
438 *Genetics*, 10:922, 2019.
  - 439 **9** Alireza Doostan and Houman Owhadi. A non-adapted sparse approximation of PDEs with  
440 stochastic inputs. *Journal of Computational Physics*, 230(8):3015–3034, 2011.
  - 441 **10** Robert Dorfman. The detection of defective members of large populations. *The Annals of*  
442 *Mathematical Statistics*, 14(4):436–440, 1943.
  - 443 **11** Sorin Drăghici and R Brian Potter. Predicting HIV drug resistance with neural networks.  
444 *Bioinformatics*, 19(1):98–107, 2003.
  - 445 **12** M. F. Duarte and Y. C. Eldar. Structured compressed sensing: From theory to applications.  
446 *IEEE Transactions on Signal Processing*, 59(9):4053–4085, 2011.
  - 447 **13** Y.C. Eldar and G. Kutyniok. *Compressed Sensing: Theory and Applications*. Cambridge  
448 University Press, 2012. URL: <https://books.google.ca/books?id=9ccLAQAAQBAJ>.
  - 449 **14** Coll F, McNerney R, Preston MD, et al. Rapid determination of anti-tuberculosis drug  
450 resistance from whole-genome sequences. *Genome Med.*, 7:51, 2015.
  - 451 **15** Silke Feuerriegel, Viola Schleusener, Patrick Beckert, Thomas A. Kohl, Paolo Miotto, Daniela M.  
452 Cirillo, Andrea M. Cabibbe, Stefan Niemann, and Kurt Fellenberg. PhyResSE: a web tool  
453 delineating Mycobacterium tuberculosis antibiotic resistance and lineage from whole-genome  
454 sequencing data. *Journal of Clinical Microbiology*, 53(6):1908–1914, 2015.
  - 455 **16** S. Foucart and H. Rauhut. *A Mathematical Introduction to Compressive Sensing*. Applied  
456 and Numerical Harmonic Analysis. Springer New York, 2013. URL: <https://books.google.ca/books?id=zb28BAAAQBAJ>.
  - 457

- 458 17 Sebastien Gagneux. Ecology and evolution of *Mycobacterium tuberculosis*. *Nat Rev Microbiol*,  
459 16:202–213, 2018.
- 460 18 Matthew A Herman and Thomas Strohmer. High-resolution radar via compressed sensing.  
461 *IEEE transactions on signal processing*, 57(6):2275–2284, 2009.
- 462 19 IBM. IBM ILOG CPLEX Optimization Studio V12.10.0 documentation. <https://www.ibm.com/support/knowledgecenter/SSSA5P>, 2020.
- 464 20 H. Iwai, M. Kato-Miyazawa, T Kirikae, and T. Miyoshi-Akiyama. CASTB (the comprehensive  
465 analysis server for the *Mycobacterium tuberculosis* complex): A publicly accessible web server  
466 for epidemiological analyses, drug-resistance prediction and phylogenetic comparison of clinical  
467 isolates. *Tuberculosis*, pages 843–844, 2015.
- 468 21 Suha Kadura, Nicholas King, Maria Nakhoul, Hongya Zhu, Grant Theron, Claudio U Köser,  
469 and Maha Farhat. Systematic review of mutations associated with resistance to the new and  
470 repurposed *Mycobacterium tuberculosis* drugs bedaquiline, clofazimine, linezolid, delamanid  
471 and pretomanid. *Journal of Antimicrobial Chemotherapy*, 05 2020. dkaa136.
- 472 22 Rasko Leinonen, Ruth Akhtar, Ewan Birney, Lawrence Bower, Ana Cerdeno-Tárraga, et al.  
473 The European Nucleotide Archive. *Nucleic Acids Research*, 39:D28–31, 2011.
- 474 23 Rasko Leinonen, Hideaki Sugawara, Martin Shumway, and International Nucleotide Se-  
475 quence Database Collaboration. The sequence read archive. *Nucleic acids research*,  
476 39(suppl\_1):D19–D21, 2010.
- 477 24 H Li. Aligning sequence reads, clone sequences and assembly contigs with BWA-MEM. *arXiv*,  
478 2013.
- 479 25 Wysoker A Fennell T Ruan J Homer N Marth G Abecasis G Durbin R; 1000 Genome Project  
480 Data Processing Subgroup Li H1, Handsaker B. The Sequence Alignment/Map format and  
481 SAMtools. *Bioinformatics*, 25(16):2078–2079, 2009.
- 482 26 Michael Lustig, David Donoho, and John M Pauly. Sparse MRI: The application of compressed  
483 sensing for rapid MR imaging. *Magnetic Resonance in Medicine: An Official Journal of the*  
484 *International Society for Magnetic Resonance in Medicine*, 58(6):1182–1195, 2007.
- 485 27 D. Malioutov and M. Malyutov. Boolean compressed sensing: LP relaxation for group testing.  
486 In *2012 IEEE International Conference on Acoustics, Speech and Signal Processing (ICASSP)*,  
487 pages 3305–3308, 2012.
- 488 28 Dmitry Malioutov and Kush Varshney. Exact rule learning via Boolean compressed sensing.  
489 In *International Conference on Machine Learning*, pages 765–773, 2013.
- 490 29 L Mathelin and KA Gallivan. A compressed sensing approach for partial differential equations  
491 with random input data. *Communications in computational physics*, 12(4):919–954, 2012.
- 492 30 Arya Mazumdar. On almost disjunct matrices for group testing. In Kun-Mao Chao, Tsan-  
493 sheng Hsu, and Der-Tsai Lee, editors, *Algorithms and Computation*, pages 649–658, Berlin,  
494 Heidelberg, 2012. Springer Berlin Heidelberg.
- 495 31 Paolo Miotto, Belay Tessema, Elisa Tagliani, Leonid Chindelevitch, et al. A standardised  
496 method for interpreting the association between mutations and phenotypic drug-resistance in  
497 *Mycobacterium tuberculosis*. *European Respiratory Journal*, 50(6), 2017.
- 498 32 W James Murdoch, Chandan Singh, Karl Kumbier, Reza Abbasi-Asl, and Bin Yu. Interpretable  
499 machine learning: definitions, methods, and applications. *arXiv*, 2019.
- 500 33 Balas Kausik Natarajan. Sparse approximate solutions to linear systems. *SIAM journal on*  
501 *computing*, 24(2):227–234, 1995.

## 23:18 An interpretable classification method for drug resistance

- 502 **34** Tra-My Ngo and Yik-Ying Teo. Genomic prediction of tuberculosis drug-resistance: bench-  
503 marking existing databases and prediction algorithms. *BMC Bioinformatics*, 20(1):68, 2019.
- 504 **35** Jim O'Neill. Antimicrobial resistance: Tackling a crisis for the health and wealth of nations.  
505 Technical report, Review on Antimicrobial Resistance, 2014. URL: [https://amr-review.org/  
506 Publications.html](https://amr-review.org/Publications.html).
- 507 **36** World Health Organization. Antimicrobial resistance: global report on surveillance. Technical  
508 report, WHO, 2014.
- 509 **37** World Health Organization. Global tuberculosis report 2019. Technical report, WHO, 2019.
- 510 **38** F. Pedregosa, G. Varoquaux, A. Gramfort, V. Michel, B. Thirion, O. Grisel, M. Blondel,  
511 P. Prettenhofer, R. Weiss, V. Dubourg, J. Vanderplas, A. Passos, D. Cournapeau, M. Brucher,  
512 M. Perrot, and E. Duchesnay. Scikit-learn: Machine learning in Python. *Journal of Machine  
513 Learning Research*, 12:2825–2830, 2011.
- 514 **39** Mario C Raviglione and Ian M Smith. XDR tuberculosis—implications for global public health.  
515 *New England Journal of Medicine*, 356(7):656–659, 2007.
- 516 **40** Marco Tulio Ribeiro, Sameer Singh, and Carlos Guestrin. "Why should i trust you?" Explaining  
517 the predictions of any classifier. In *Proceedings of the 22nd ACM SIGKDD International  
518 Conference on Knowledge Discovery and Data Mining*, pages 1135–1144, 2016.
- 519 **41** Mark A. DePristo Tim J. Fennell Mauricio O. Carneiro Geraldine A. Van der Auwera David  
520 E. Kling Laura D. Gauthier Ami Levy-Moonshine David Roazen Khalid Shakir Joel Thibault  
521 Sheila Chandran Chris Whelan Monkol Lek Stacey Gabriel Mark J Daly Ben Neale Daniel G.  
522 MacArthur Eric Banks Ryan Poplin, Valentin Ruano-Rubio. Scaling accurate genetic variant  
523 discovery to tens of thousands of samples. *bioRxiv*, 2017.
- 524 **42** James Emmanuel San, Shakuntala Baichoo, Aquillah Kanzi, Yumna Moosa, Richard Lessells,  
525 Vagner Fonseca, John Mogaka, Robert Power, and Tulio de Oliveira. Current affairs of  
526 microbial genome-wide association studies: Approaches, bottlenecks and analytical pitfalls.  
527 *Frontiers in Microbiology*, 10:3119, 2020. URL: [https://www.frontiersin.org/article/10.  
528 3389/fmicb.2019.03119](https://www.frontiersin.org/article/10.3389/fmicb.2019.03119).
- 529 **43** V. Schleusener, C. Köser, P. Beckert, et al. Mycobacterium tuberculosis resistance prediction  
530 and lineage classification from genome sequencing: comparison of automated analysis tools.  
531 *Scientific Reports*, 7, 2017.
- 532 **44** Angela M Starks, Enrique Avilés, Daniela M Cirillo, Claudia M Denking, David L Dolinger,  
533 Claudia Emerson, Jim Gallarda, Debra Hanna, Peter S Kim, Richard Liwski, et al. Collab-  
534 orative effort for a centralized worldwide tuberculosis relational sequencing data platform.  
535 *Clinical Infectious Diseases*, 61(suppl\_3):S141–S146, 2015.
- 536 **45** A Steiner, D Stucki, M Coscolla, S Borrell, and S Gagneux. KvarQ: targeted and direct variant  
537 calling from fastq reads of bacterial genomes. *BMC Genomics*, 15, 2014.
- 538 **46** Alice R Wattam, David Abraham, Oral Dalay, Terry L Disz, Timothy Driscoll, Joseph L  
539 Gabbard, Joseph J Gillespie, Roger Gough, Deborah Hix, Ronald Kenyon, et al. PATRIC, the  
540 bacterial bioinformatics database and analysis resource. *Nucleic acids research*, 42(D1):D581–  
541 D591, 2014.
- 542 **47** Yang Yang, Katherine E Niehaus, Timothy M Walker, Zamin Iqbal, A Sarah Walker, Daniel J  
543 Wilson, Tim EA Peto, Derrick W Crook, E Grace Smith, Tingting Zhu, et al. Machine  
544 learning for classifying tuberculosis drug-resistance from DNA sequencing data. *Bioinformatics*,  
545 34(10):1666–1671, 2018.
